# Supplementary material
Source: PubMed Central journal article supplement (PMC8359333)

Supplemental Figure 1

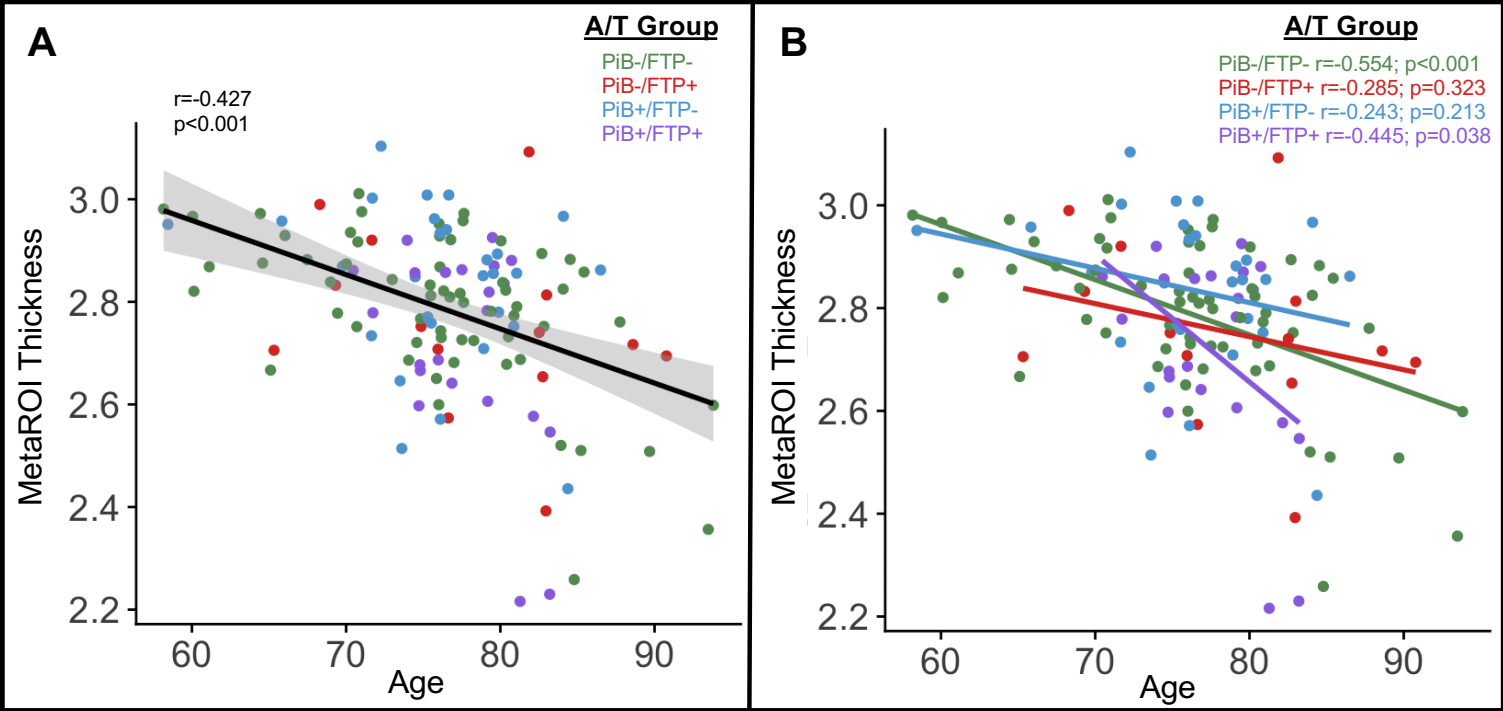

Supplemental Figure 2

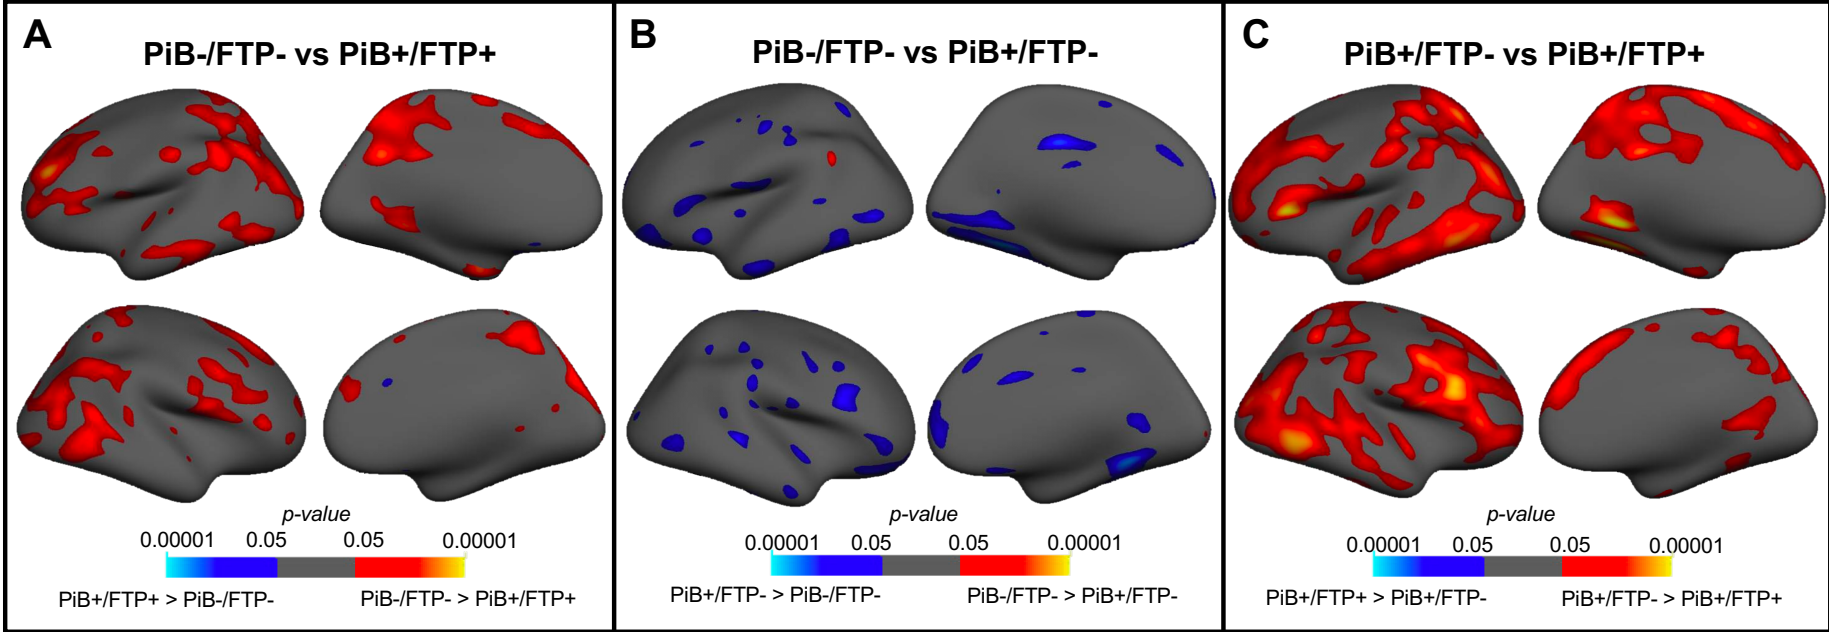

Supplemental Figure 3

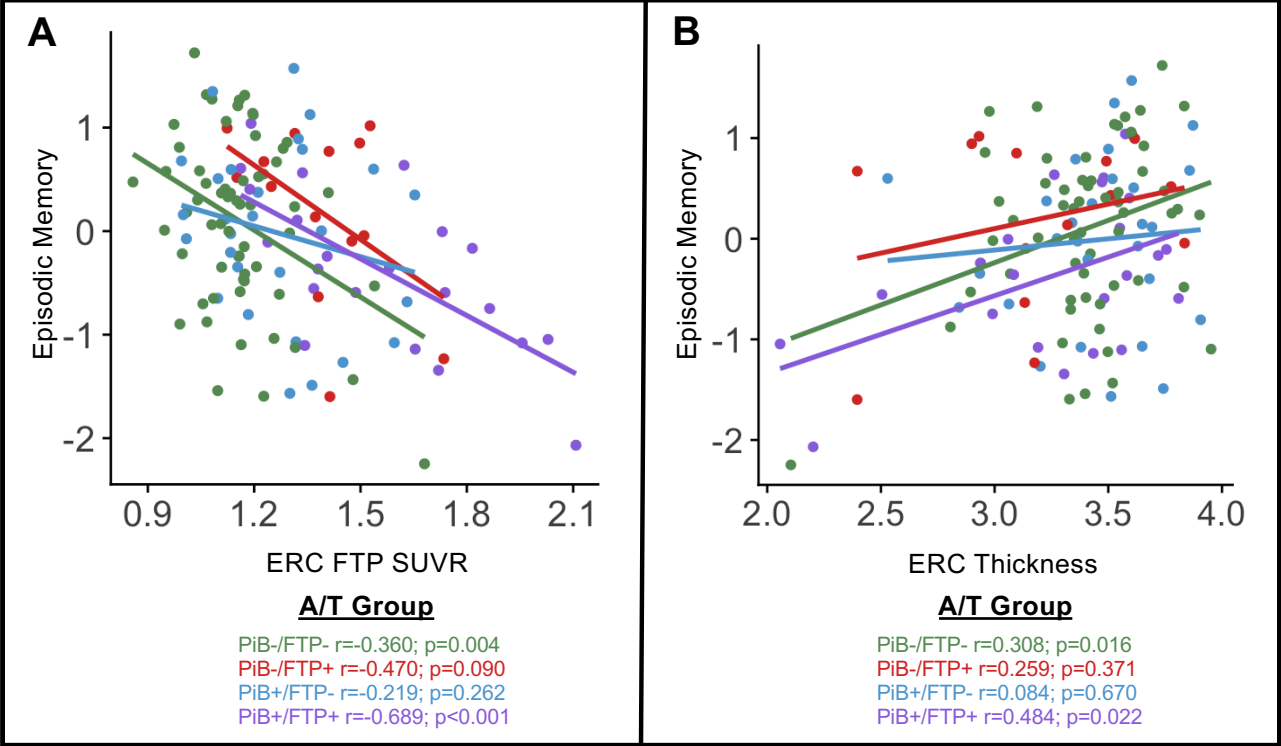

Supplemental Figure 4

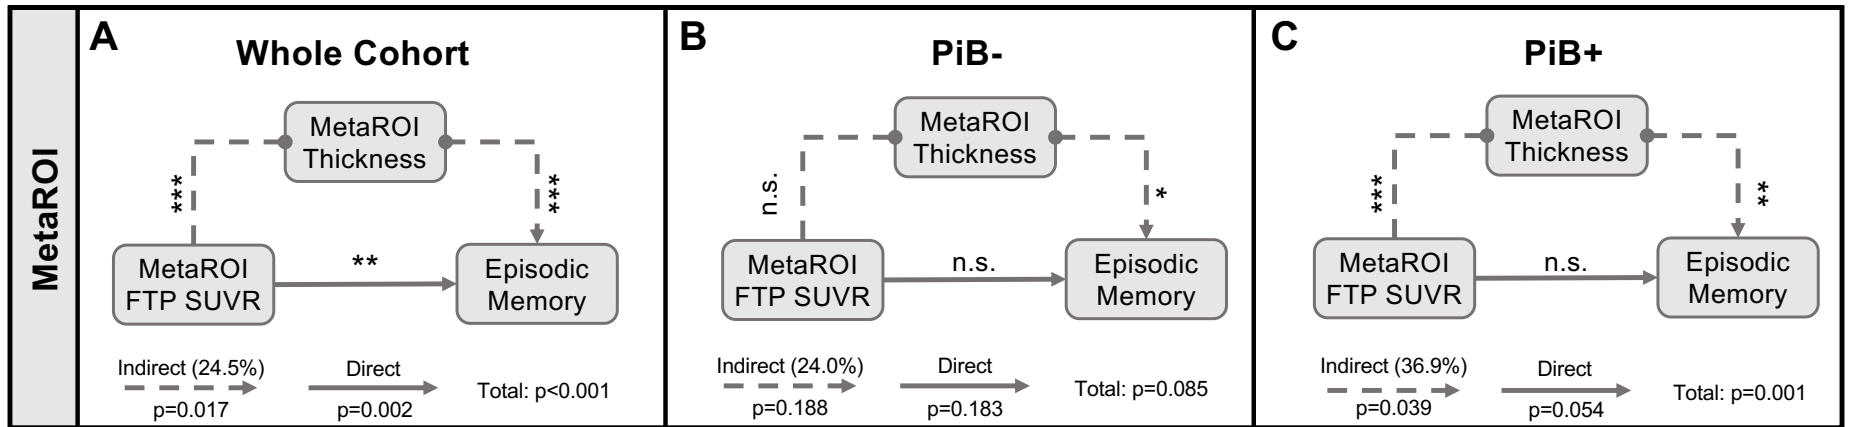

Supplement: ALZ-17-1085-s002.pdf [file ALZ-17-1085-s002.pdf]
